# Supplementary material for: Targeting CLEC9A delivers antigen to human CD141+ DC for CD4+ and CD8+T cell recognition
Source: JCI journal article supplement (doi:10.1172/jci.insight.87102), 2016-05-18
Supplement: sd1 [file 1]

## Supplementary Material

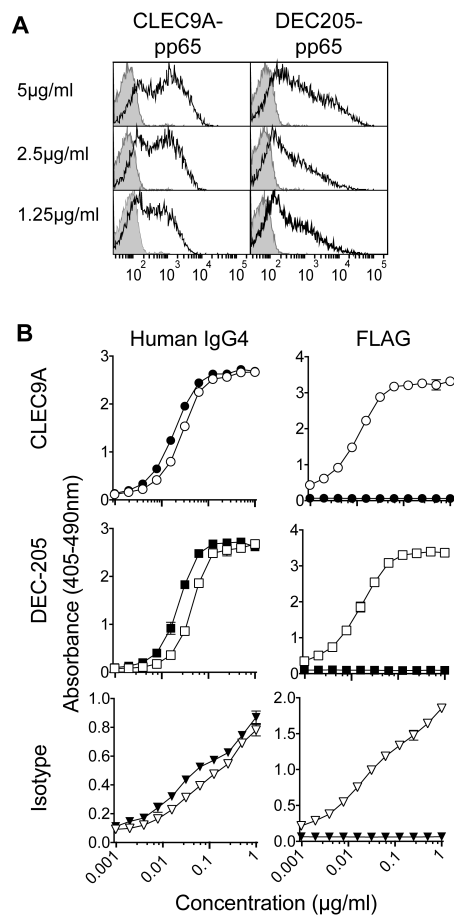

**Figure S1.** *Validation of purified human chimaeric Ab-pp65 fusion proteins.* **(A)** Ability of purified Ab-pp65 fusion proteins to retain binding to target receptor was assessed by staining of 293F cells transfected with recombinant full-length CLEC9A with anti-CLEC9A-pp65 (black, left panel) or full-length recombinant DEC-205 with anti-DEC-205-pp65 (black, right panel) over a range of concentrations compared to the isotype control (grey). Ab-pp65 fusion proteins were detected with anti-human IgG4-biotin and streptavidin-PE and analyzed by flow cytometry **(B)** Validation of purified human chimeric Ab (open symbols) and Ab-pp65 fusion proteins (closed symbols) by ELISA. Ab or Ab-pp65 fusion proteins were incubated on plates coated with CLEC9A peptide, DEC-205 recombinant protein or  $\beta$ -gal and were detected using anti-human IgG4-biotin and streptavidin-HRP (left panel) or anti-FLAG-HRP Ab (right panel).

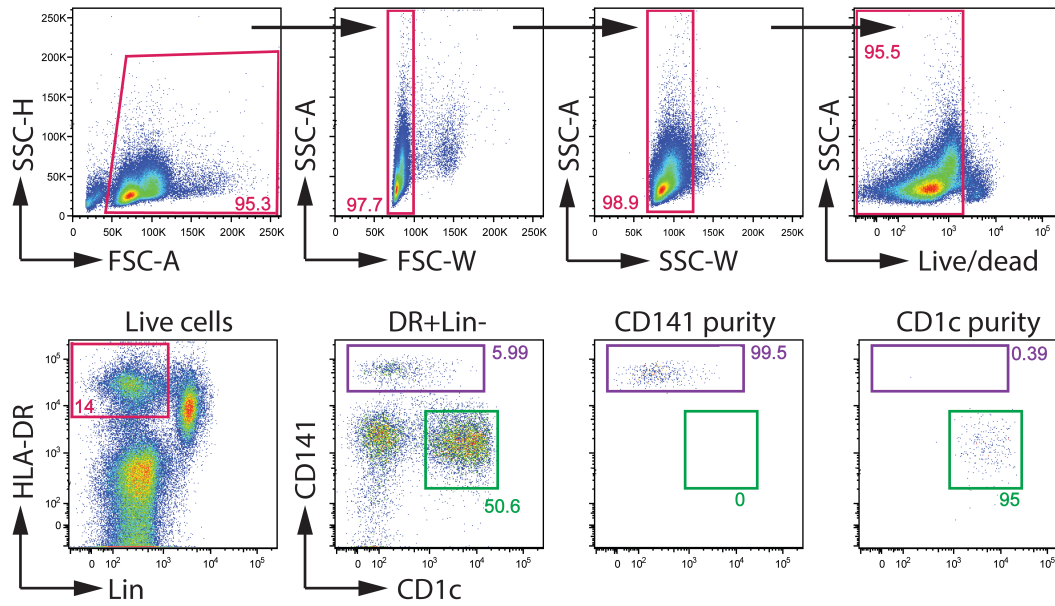

**Figure S2.** *Gating strategy for sorting of human blood DC.* PBMC were isolated using a Ficoll Hypaque density gradient and cDC were enriched using the Myeloid DC enrichment kit (Stem Cell). The enriched cells were stained with live/dead aqua, HLA-DR, CD1c, CD141 and lineage markers (lin); CD3, CD14, CD16, CD19, CD20, CD56. Cells were sorted using a live cell gate and HLA-DR<sup>+</sup>lin<sup>-</sup> and according to expression of CD141 and CD1c.

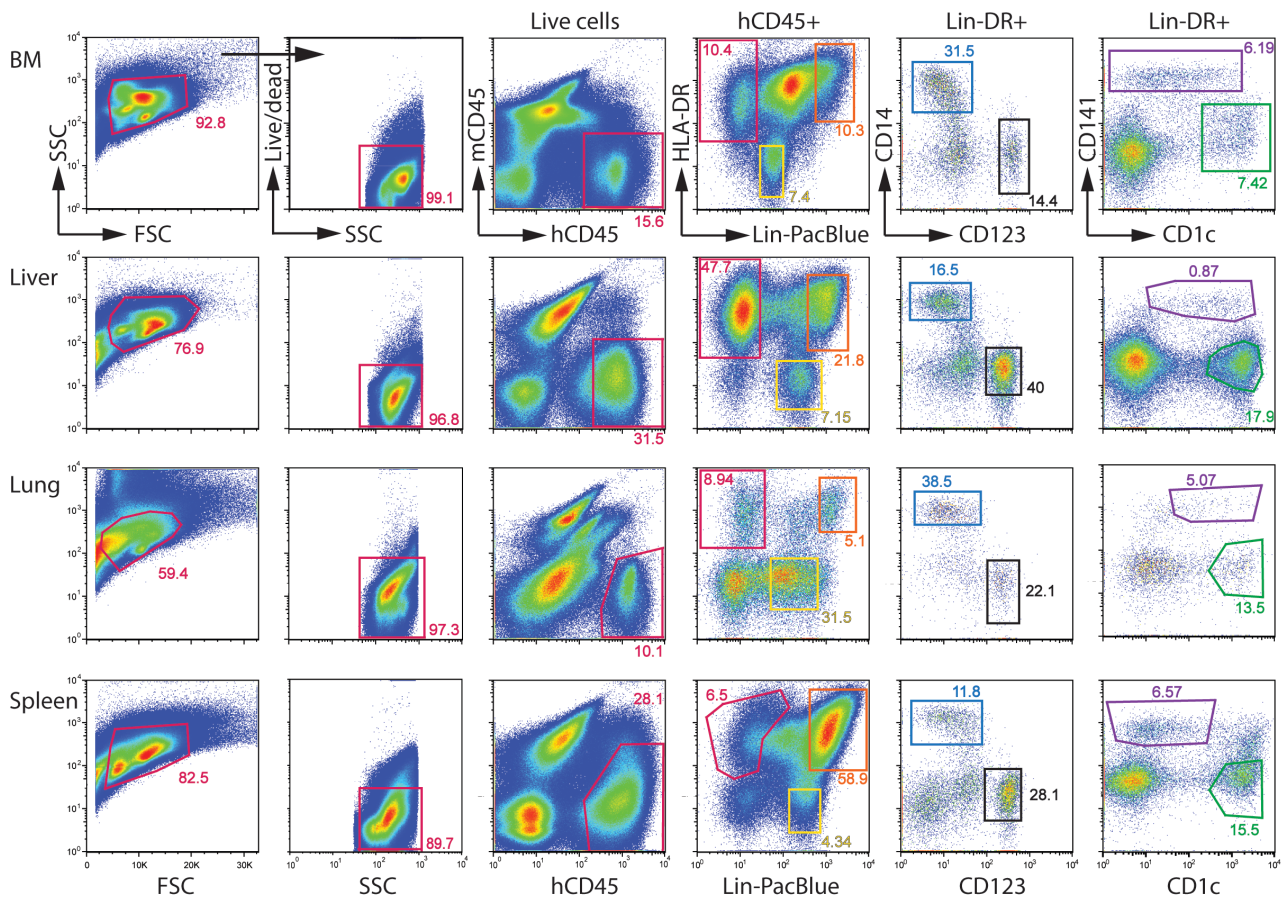

**Figure S3.** Gating strategy for identification of human DC in engrafted NSG-A2 humanized mice.

BM, liver, lung and spleen tissue were harvested 2h post-injection with 5 $\mu$ g of Alexa Fluor (AF)488-conjugated human chimaeric Ab and leukocytes were stained with live/dead, HLA-DR, CD141, CD1c, CD123, CD14 and lineage markers; mouse (m)CD45, human (h)CD45, CD3, CD16, CD19 and CD20. In addition, CD14 was included in the lineage markers for identification of CD141<sup>+</sup> DC and CD1c<sup>+</sup> DC subsets. Human cells were identified as live hCD45<sup>+</sup> mCD45<sup>-</sup> and gated according to expression of lineage markers (lin); T cells (yellow): HLA-DR<sup>+</sup>lin<sup>+</sup>, B cells (orange): HLA-DR<sup>+</sup>lin<sup>-</sup>, Monocytes (blue): HLA-DR<sup>+</sup>lin<sup>-</sup>CD14<sup>+</sup>, pDC (black): HLA-DR<sup>+</sup>lin<sup>-</sup>CD123<sup>+</sup>, CD141 DC (purple): HLA-DR<sup>+</sup>lin<sup>-</sup>CD14<sup>-</sup>CD141<sup>+</sup>, CD1c DC (green): HLA-DR<sup>+</sup>lin<sup>-</sup>CD14<sup>-</sup>CD1c<sup>+</sup>.

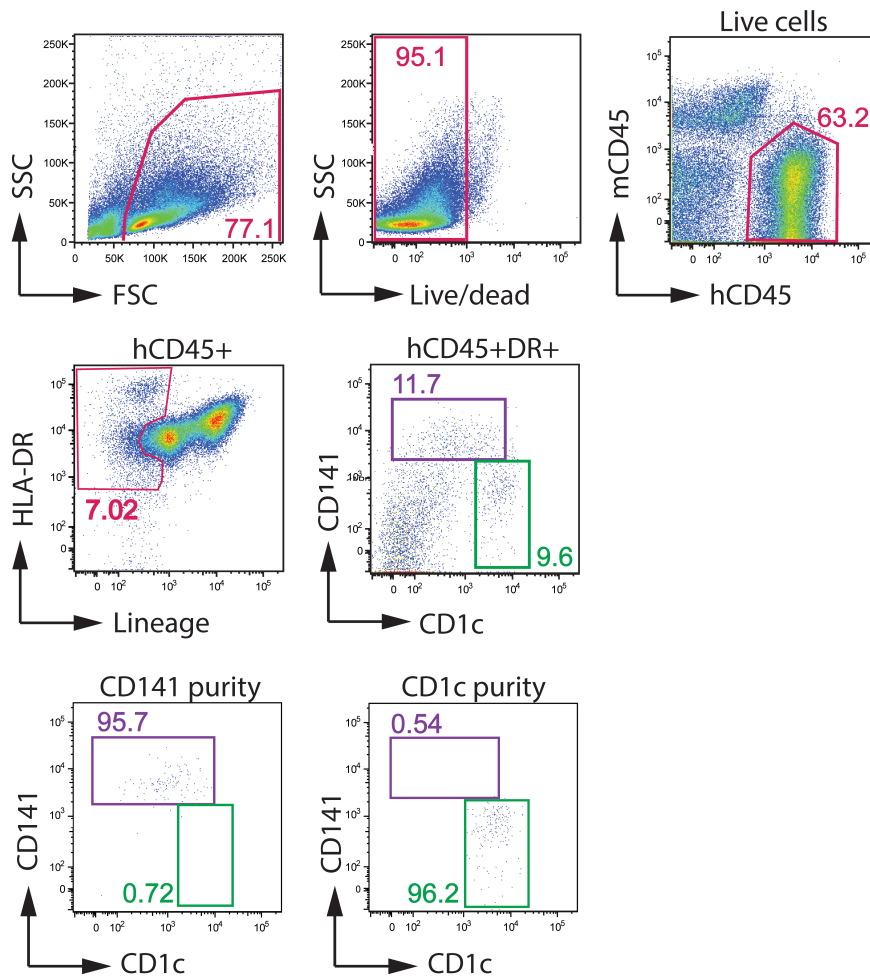

**Figure S4.** Gating strategy for sorting of human DC from spleen of engrafted huNSG-A2 mice.

Spleen tissue from engrafted and Flt3L-injected NSG-A2 humanized mice was harvested 24h post-injection with 10 $\mu$ g Ab-pp65 and 50 $\mu$ g polyI:C. Leukocytes were isolated using density gradient centrifugation and stained with live/dead aqua, human (h)CD45, mouse (m)CD45, HLA-DR, CD123, CD1c, CD141 and lineage markers (lin); CD3, CD14, CD16, CD19, CD20. Human DC were identified using live cell gates and were hCD45<sup>+</sup>mCD45<sup>-</sup>HLA-DR<sup>+</sup>lin<sup>-</sup> and sorted according to expression of CD1c and CD141.
